# Supplementary material for: Temporal trends in hypertension and pulmonary embolism–related mortality in the United States: A population-based study using CDC WONDER, 2000–2020
Source: Research Square preprint supplement (doi:10.21203/rs.3.rs-7622619/v1), 2025-09-23
Supplement: Supplementary file 1 [file 33614f9325dd85e55520f21e.docx]

**SUPPLEMENTARY MATERIAL**

**
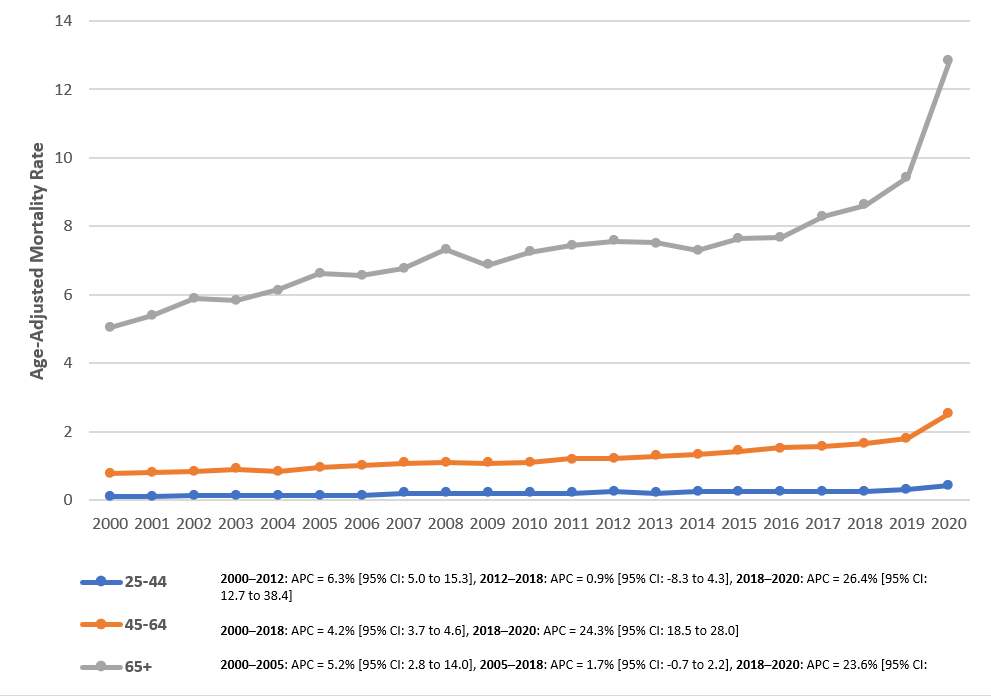
**

**Supplementary Figure 1**: Trends in HTN and PE-related AAMR per 100,000, stratified by age groups, in the United States from 2000-2020.

**
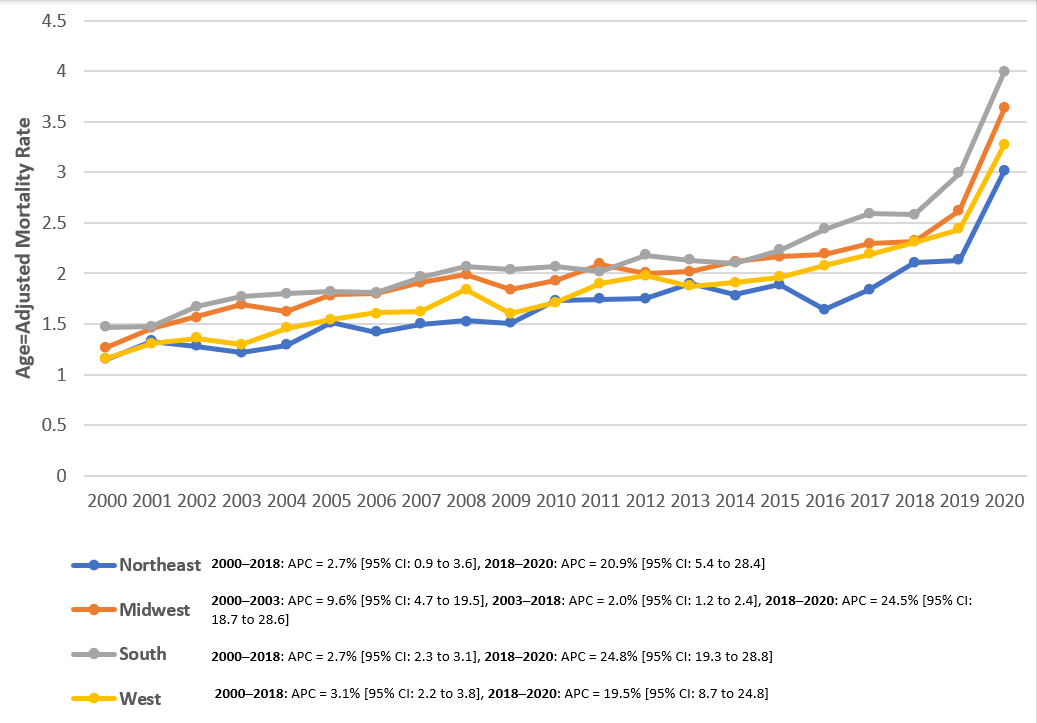
**

**Supplementary Figure 2**: Trends in HTN and PE-related AAMR per 100,000, stratified by census region, in the United States from 2000-2020.

**
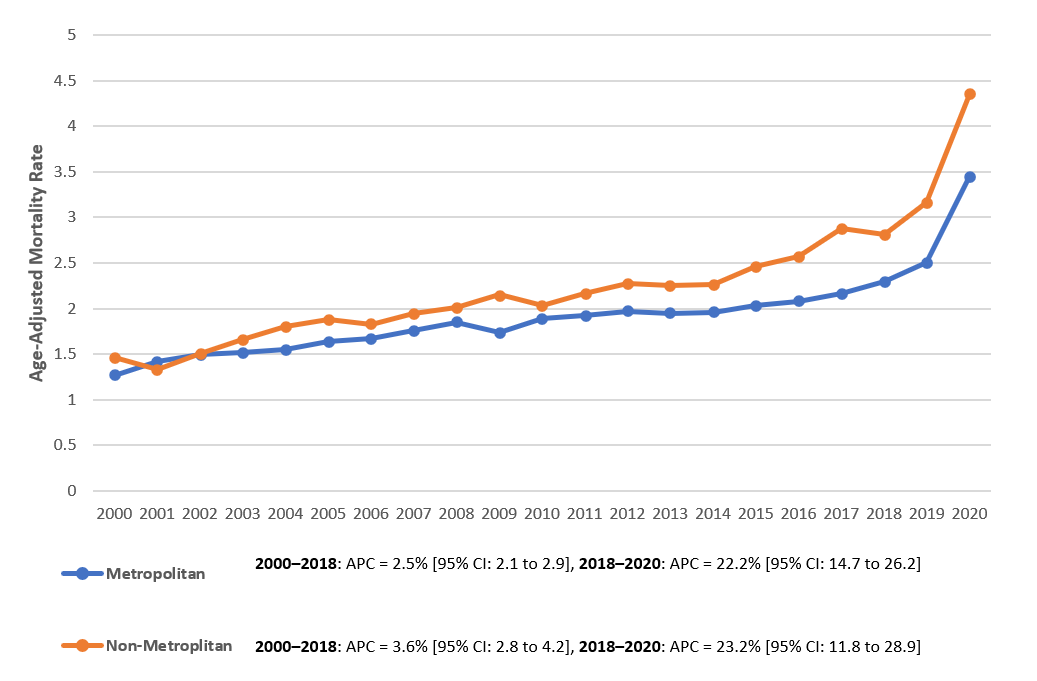
**

**Supplementary Figure 3**: Trends in HTN and PE-related AAMR per 100,000, stratified by urbanization, in the United States from 2000-2020.

| **Year** | **Overall** | **Female** | **Male** | **Hispanic or Latino** | **NH Asian** | **NH Black** | **NH white** | **Population** |
| --- | --- | --- | --- | --- | --- | --- | --- | --- |
| **2000** | 2330 | 1457 | 873 | 78 | 23 | 542 | 1674 | 181984640 |
| **2001** | 2562 | 1544 | 1018 | 113 | 26 | 586 | 1814 | 184305128 |
| **2002** | 2790 | 1759 | 1031 | 122 | 27 | 663 | 1963 | 186208028 |
| **2003** | 2898 | 1785 | 1113 | 95 | 23 | 661 | 2111 | 188090429 |
| **2004** | 3001 | 1791 | 1210 | 108 | 37 | 680 | 2165 | 190205384 |
| **2005** | 3295 | 1989 | 1306 | 145 | 31 | 767 | 2334 | 192551384 |
| **2006** | 3345 | 1991 | 1354 | 135 | 33 | 742 | 2421 | 195019359 |
| **2007** | 3611 | 2068 | 1543 | 143 | 43 | 812 | 2596 | 197403777 |
| **2008** | 3898 | 2264 | 1634 | 179 | 50 | 861 | 2787 | 199795090 |
| **2009** | 3799 | 2184 | 1615 | 189 | 43 | 871 | 2673 | 202107016 |
| **2010** | 4069 | 2298 | 1771 | 203 | 48 | 886 | 2907 | 203891983 |
| **2011** | 4298 | 2392 | 1906 | 214 | 63 | 856 | 3138 | 206592936 |
| **2012** | 4534 | 2562 | 1972 | 229 | 62 | 962 | 3238 | 208826037 |
| **2013** | 4621 | 2547 | 2074 | 230 | 50 | 978 | 3333 | 211085314 |
| **2014** | 4702 | 2518 | 2184 | 292 | 52 | 972 | 3354 | 213809280 |
| **2015** | 5037 | 2652 | 2385 | 303 | 68 | 1008 | 3614 | 216553817 |
| **2016** | 5260 | 2777 | 2483 | 333 | 69 | 1048 | 3772 | 218641417 |
| **2017** | 5730 | 2995 | 2735 | 321 | 84 | 1152 | 4113 | 221447331 |
| **2018** | 6093 | 3121 | 2972 | 341 | 88 | 1221 | 4380 | 223311190 |
| **2019** | 6818 | 3559 | 3259 | 424 | 123 | 1418 | 4797 | 224981167 |
| **2020** | 9490 | 4871 | 4619 | 663 | 164 | 2015 | 6560 | 226635013 |
| **Tota** | 92181 | 51124 | 41057 | 4860 | 1207 | 19701 | 65744 | 4293445720 |

**Supplementary Table 1**. Overall and sex stratified HTN and PE-related mortality among United States adults from 2000 to 2020.

| **Year** | **Overall** | **Female** | **Male** |
| --- | --- | --- | --- |
| **2000** | 1.30 (1.25–1.36) | 1.37 (1.30–1.44) | 1.17 (1.09–1.25) |
| **2001** | 1.39 (1.33–1.44) | 1.41 (1.34–1.48) | 1.36 (1.27–1.44) |
| **2002** | 1.52 (1.46–1.57) | 1.61 (1.54–1.69) | 1.36 (1.27–1.44) |
| **2003** | 1.53 (1.47–1.58) | 1.61 (1.53–1.68) | 1.41 (1.33–1.50) |
| **2004** | 1.57 (1.51–1.63) | 1.59 (1.52–1.67) | 1.52 (1.43–1.61) |
| **2005** | 1.70 (1.64–1.75) | 1.74 (1.66–1.81) | 1.59 (1.51–1.68) |
| **2006** | 1.71 (1.65–1.76) | 1.70 (1.62–1.78) | 1.61 (1.52–1.70) |
| **2007** | 1.79 (1.73–1.85) | 1.75 (1.68–1.83) | 1.79 (1.70–1.88) |
| **2008** | 1.91 (1.85–1.97) | 1.88 (1.80–1.96) | 1.86 (1.77–1.96) |
| **2009** | 1.81 (1.76–1.87) | 1.82 (1.74–1.90) | 1.79 (1.70–1.88) |
| **2010** | 1.90 (1.84–1.95) | 1.87 (1.79–1.95) | 1.91 (1.82–2.00) |
| **2011** | 1.97 (1.91–2.03) | 1.89 (1.81–1.96) | 2.00 (1.91–2.09) |
| **2012** | 2.02 (1.96–2.08) | 2.01 (1.93–2.09) | 2.00 (1.91–2.09) |
| **2013** | 2.01 (1.95–2.07) | 1.96 (1.88–2.03) | 2.04 (1.95–2.13) |
| **2014** | 2.01 (1.96–2.07) | 1.88 (1.81–1.96) | 2.13 (2.04–2.22) |
| **2015** | 2.11 (2.05–2.17) | 1.97 (1.89–2.04) | 2.24 (2.15–2.33) |
| **2016** | 2.15 (2.09–2.21) | 2.01 (1.93–2.09) | 2.29 (2.20–2.38) |
| **2017** | 2.28 (2.22–2.34) | 2.11 (2.03–2.19) | 2.45 (2.36–2.54) |
| **2018** | 2.37 (2.31–2.43) | 2.16 (2.08–2.24) | 2.60 (2.51–2.70) |
| **2019** | 2.61 (2.55–2.68) | 2.42 (2.34–2.50) | 2.79 (2.70–2.89) |
| **2020** | 3.58 (3.50–3.65) | 3.24 (3.15–3.33) | 3.92 (3.80–4.03) |

**Supplementary Table 2.** Overall and sex stratified HTN and PE-related AAMR per 100,000 in the United States from 2000-2020

| **Year** | **Hispanic or Latino** | **NH Asian** | **NH Black or African American** | **NH White** |
| --- | --- | --- | --- | --- |
| **2000** | 0.86 (0.67–1.08) | 0.51 (0.32–0.78) | 3.49 (3.19–3.79) | 1.11 (1.06–1.16) |
| **2001** | 1.20 (0.97–1.43) | 0.54 (0.34–0.81) | 3.69 (3.39–3.99) | 1.21 (1.15–1.27) |
| **2002** | 1.19 (0.97–1.42) | 0.56 (0.36–0.83) | 4.10 (3.78–4.42) | 1.27 (1.21–1.33) |
| **2003** | 0.87 (0.69–1.07) | 0.46 (0.29–0.71) | 3.96 (3.65–4.27) | 1.38 (1.32–1.44) |
| **2004** | 0.91 (0.73–1.09) | 0.69 (0.48–0.96) | 4.11 (3.79–4.42) | 1.40 (1.34–1.46) |
| **2005** | 1.16 (0.96–1.36) | 0.54 (0.36–0.77) | 4.48 (4.16–4.80) | 1.47 (1.41–1.53) |
| **2006** | 1.06 (0.87–1.24) | 0.55 (0.37–0.78) | 4.19 (3.88–4.50) | 1.48 (1.42–1.54) |
| **2007** | 1.05 (0.86–1.23) | 0.66 (0.47–0.90) | 4.44 (4.13–4.76) | 1.58 (1.52–1.64) |
| **2008** | 1.28 (1.09–1.48) | 0.72 (0.52–0.96) | 4.63 (4.31–4.94) | 1.68 (1.62–1.75) |
| **2009** | 1.26 (1.07–1.45) | 0.59 (0.42–0.80) | 4.50 (4.19–4.80) | 1.61 (1.54–1.67) |
| **2010** | 1.30 (1.11–1.49) | 0.59 (0.43–0.80) | 4.52 (4.21–4.83) | 1.74 (1.67–1.80) |
| **2011** | 1.30 (1.12–1.49) | 0.78 (0.59–1.00) | 4.20 (3.91–4.49) | 1.81 (1.75–1.88) |
| **2012** | 1.26 (1.08–1.43) | 0.72 (0.55–0.93) | 4.58 (4.28–4.88) | 1.85 (1.78–1.92) |
| **2013** | 1.22 (1.05–1.38) | 0.53 (0.39–0.71) | 4.49 (4.20–4.78) | 1.88 (1.81–1.94) |
| **2014** | 1.43 (1.26–1.60) | 0.50 (0.37–0.66) | 4.32 (4.04–4.60) | 1.85 (1.79–1.91) |
| **2015** | 1.47 (1.30–1.65) | 0.64 (0.50–0.82) | 4.28 (4.01–4.55) | 1.96 (1.90–2.03) |
| **2016** | 1.52 (1.35–1.69) | 0.64 (0.49–0.81) | 4.33 (4.06–4.60) | 2.02 (1.95–2.08) |
| **2017** | 1.34 (1.19–1.49) | 0.67 (0.53–0.84) | 4.68 (4.40–4.96) | 2.17 (2.11–2.24) |
| **2018** | 1.40 (1.25–1.56) | 0.71 (0.56–0.87) | 4.86 (4.58–5.14) | 2.27 (2.20–2.34) |
| **2019** | 1.69 (1.53–1.86) | 0.93 (0.76–1.10) | 5.39 (5.11–5.68) | 2.44 (2.37–2.52) |
| **2020** | 2.47 (2.28–2.67) | 1.20 (1.01–1.38) | 7.52 (7.18–7.86) | 3.31 (3.23–3.39) |

**Supplementary Table 3.** HTN and PE-related AAMR per 100,000 stratified by race in the United States from 2000-2020.

| **Year** | **Young Adults (25-44)** | **Middle-Aged Adults (45-64)** | **Old Adults (65-85+)** |
| --- | --- | --- | --- |
| **2000** | 0.11 (0.09–0.13) | 0.78 (0.71–0.84) | 5.04 (4.81–5.28) |
| **2001** | 0.11 (0.09–0.13) | 0.81 (0.75–0.88) | 5.41 (5.17–5.65) |
| **2002** | 0.15 (0.13–0.18) | 0.85 (0.78–0.92) | 5.90 (5.65–6.16) |
| **2003** | 0.15 (0.13–0.18) | 0.91 (0.84–0.99) | 5.83 (5.59–6.08) |
| **2004** | 0.15 (0.13–0.18) | 0.85 (0.79–0.92) | 6.16 (5.91–6.42) |
| **2005** | 0.15 (0.13–0.18) | 0.95 (0.88–1.02) | 6.64 (6.38–6.90) |
| **2006** | 0.15 (0.12–0.18) | 1.01 (0.94–1.09) | 6.58 (6.33–6.84) |
| **2007** | 0.21 (0.18–0.24) | 1.08 (1.00–1.15) | 6.76 (6.50–7.02) |
| **2008** | 0.21 (0.17–0.24) | 1.11 (1.04–1.19) | 7.34 (7.07–7.61) |
| **2009** | 0.21 (0.18–0.24) | 1.09 (1.02–1.16) | 6.87 (6.61–7.13) |
| **2010** | 0.21 (0.18–0.24) | 1.11 (1.04–1.19) | 7.25 (6.98–7.51) |
| **2011** | 0.21 (0.18–0.24) | 1.21 (1.14–1.29) | 7.43 (7.17–7.69) |
| **2012** | 0.26 (0.23–0.30) | 1.23 (1.16–1.31) | 7.57 (7.31–7.83) |
| **2013** | 0.21 (0.18–0.24) | 1.29 (1.22–1.37) | 7.52 (7.26–7.78) |
| **2014** | 0.26 (0.23–0.30) | 1.35 (1.28–1.43) | 7.31 (7.06–7.56) |
| **2015** | 0.26 (0.23–0.30) | 1.43 (1.35–1.51) | 7.66 (7.41–7.91) |
| **2016** | 0.26 (0.23–0.30) | 1.53 (1.45–1.62) | 7.69 (7.44–7.94) |
| **2017** | 0.26 (0.23–0.30) | 1.57 (1.49–1.65) | 8.29 (8.04–8.55) |
| **2018** | 0.26 (0.23–0.30) | 1.65 (1.56–1.74) | 8.62 (8.36–8.87) |
| **2019** | 0.32 (0.28–0.36) | 1.81 (1.72–1.90) | 9.44 (9.17–9.70) |
| **2020** | 0.42 (0.37–0.46) | 2.55 (2.44–2.65) | 12.83 (12.53–13.14) |

**Supplementary Table 4**. HTN and PE-related AAMR per 100,000 stratified by Age Grp in the United States from 2000-2020.

| **Year** | **Northeast** | **Midwest** | **South** | **West** |
| --- | --- | --- | --- | --- |
| **2000** | 1.15 (1.04–1.25) | 1.27 (1.17–1.38) | 1.47 (1.37–1.56) | 1.16 (1.05–1.27) |
| **2001** | 1.33 (1.21–1.44) | 1.46 (1.35–1.58) | 1.48 (1.39–1.57) | 1.31 (1.19–1.43) |
| **2002** | 1.28 (1.17–1.39) | 1.57 (1.45–1.69) | 1.67 (1.57–1.77) | 1.36 (1.24–1.48) |
| **2003** | 1.22 (1.11–1.33) | 1.69 (1.57–1.81) | 1.77 (1.67–1.87) | 1.30 (1.19–1.41) |
| **2004** | 1.29 (1.18–1.41) | 1.62 (1.50–1.73) | 1.80 (1.70–1.90) | 1.46 (1.34–1.58) |
| **2005** | 1.52 (1.40–1.64) | 1.79 (1.66–1.91) | 1.82 (1.72–1.92) | 1.54 (1.42–1.66) |
| **2006** | 1.42 (1.30–1.54) | 1.80 (1.68–1.92) | 1.81 (1.71–1.91) | 1.61 (1.49–1.74) |
| **2007** | 1.50 (1.38–1.62) | 1.91 (1.78–2.04) | 1.96 (1.86–2.06) | 1.62 (1.49–1.74) |
| **2008** | 1.53 (1.41–1.65) | 1.99 (1.86–2.11) | 2.07 (1.96–2.17) | 1.84 (1.71–1.97) |
| **2009** | 1.51 (1.39–1.64) | 1.84 (1.71–1.96) | 2.04 (1.93–2.14) | 1.60 (1.48–1.72) |
| **2010** | 1.73 (1.60–1.86) | 1.93 (1.80–2.05) | 2.07 (1.97–2.18) | 1.71 (1.59–1.83) |
| **2011** | 1.74 (1.61–1.86) | 2.09 (1.96–2.22) | 2.02 (1.92–2.12) | 1.90 (1.78–2.03) |
| **2012** | 1.75 (1.63–1.88) | 2.00 (1.88–2.13) | 2.18 (2.08–2.28) | 1.98 (1.85–2.10) |
| **2013** | 1.90 (1.77–2.03) | 2.02 (1.89–2.14) | 2.13 (2.03–2.23) | 1.87 (1.75–1.99) |
| **2014** | 1.79 (1.66–1.92) | 2.12 (1.99–2.24) | 2.10 (2.00–2.19) | 1.91 (1.79–2.03) |
| **2015** | 1.89 (1.76–2.01) | 2.17 (2.04–2.30) | 2.23 (2.13–2.33) | 1.96 (1.84–2.08) |
| **2016** | 1.64 (1.52–1.76) | 2.19 (2.07–2.32) | 2.44 (2.34–2.55) | 2.08 (1.96–2.20) |
| **2017** | 1.84 (1.71–1.97) | 2.30 (2.17–2.43) | 2.59 (2.49–2.70) | 2.19 (2.06–2.31) |
| **2018** | 2.11 (1.98–2.25) | 2.32 (2.19–2.45) | 2.58 (2.47–2.68) | 2.31 (2.18–2.43) |
| **2019** | 2.13 (2.00–2.26) | 2.62 (2.48–2.75) | 2.99 (2.87–3.10) | 2.44 (2.31–2.57) |
| **2020** | 3.02 (2.86–3.18) | 3.63 (3.47–3.79) | 4.00 (3.87–4.12) | 3.28 (3.14–3.43) |

**Supplementary Table 5** HTN and PE-related AAMR per 100,000 stratified by census region in the United States from 2000-2020.

| **Year** | **Metropolitan** | **Non-Metropolitan** |
| --- | --- | --- |
| **2000** | 1.27 (1.22–1.33) | 1.46 (1.33–1.59) |
| **2001** | 1.42 (1.36–1.49) | 1.33 (1.21–1.45) |
| **2002** | 1.50 (1.44–1.56) | 1.51 (1.38–1.64) |
| **2003** | 1.52 (1.45–1.58) | 1.66 (1.52–1.80) |
| **2004** | 1.55 (1.48–1.61) | 1.80 (1.65–1.94) |
| **2005** | 1.64 (1.58–1.70) | 1.88 (1.74–2.02) |
| **2006** | 1.67 (1.61–1.74) | 1.83 (1.69–1.97) |
| **2007** | 1.76 (1.70–1.82) | 1.94 (1.79–2.08) |
| **2008** | 1.85 (1.79–1.92) | 2.01 (1.87–2.16) |
| **2009** | 1.74 (1.68–1.80) | 2.15 (2.00–2.30) |
| **2010** | 1.89 (1.82–1.95) | 2.03 (1.88–2.18) |
| **2011** | 1.92 (1.85–1.98) | 2.17 (2.02–2.32) |
| **2012** | 1.97 (1.91–2.04) | 2.28 (2.13–2.44) |
| **2013** | 1.95 (1.89–2.02) | 2.25 (2.10–2.40) |
| **2014** | 1.96 (1.90–2.02) | 2.26 (2.11–2.41) |
| **2015** | 2.03 (1.97–2.10) | 2.46 (2.30–2.62) |
| **2016** | 2.08 (2.01–2.14) | 2.57 (2.41–2.73) |
| **2017** | 2.17 (2.11–2.24) | 2.88 (2.71–3.05) |
| **2018** | 2.30 (2.24–2.37) | 2.81 (2.64–2.98) |
| **2019** | 2.50 (2.44–2.57) | 3.16 (2.99–3.34) |
| **2020** | 3.45 (3.37–3.53) | 4.35 (4.15–4.56) |

**Supplementary Table 6.** HTN and PE-related AAMR per 100,000 stratified by urbanization in the United States from 2000-2020

| **State** | **Age Adjusted Rate**  **(95% CI)** | |
| --- | --- | --- |
| **Alabama** | 1.88 (1.78–1.98) |  |
| **Alaska** | 1.35 (1.07–1.69) |  |
| **Arizona** | 1.44 (1.36–1.51) |  |
| **Arkansas** | 2.68 (2.53–2.84) |  |
| **California** | 2.07 (2.03–2.11) |  |
| **Colorado** | 2.69 (2.57–2.82) |  |
| **Connecticut** | 1.38 (1.29–1.48) |  |
| **Delaware** | 1.93 (1.69–2.16) |  |
| **District of Columbia** | 5.54 (5.02–6.05) |  |
| **Florida** | 1.30 (1.26–1.34) |  |
| **Georgia** | 1.85 (1.78–1.93) |  |
| **Hawaii** | 0.93 (0.80–1.05) |  |
| **Idaho** | 1.70 (1.52–1.87) |  |
| **Illinois** | 1.71 (1.65–1.77) |  |
| **Indiana** | 2.19 (2.09–2.28) |  |
| **Iowa** | 1.90 (1.78–2.02) |  |
| **Kansas** | 1.50 (1.38–1.62) |  |
| **Kentucky** | 2.26 (2.14–2.38) |  |
| **Louisiana** | 2.21 (2.09–2.32) |  |
| **Maine** | 0.91 (0.79–1.04) |  |
| **Maryland** | 3.11 (2.99–3.23) |  |
| **Massachusetts** | 1.12 (1.06–1.19) |  |
| **Michigan** | 1.85 (1.78–1.91) |  |
| **Minnesota** | 2.45 (2.34–2.56) |  |
| **Mississippi** | 3.96 (3.77–4.15) |  |
| **Missouri** | 1.71 (1.62–1.79) |  |
| **Montana** | 1.74 (1.54–1.94) |  |
| **Nebraska** | 2.54 (2.35–2.72) |  |
| **Nevada** | 1.30 (1.18–1.42) |  |
| **New Hampshire** | 1.38 (1.22–1.54) |  |
| **New Jersey** | 1.84 (1.77–1.91) |  |
| **New Mexico** | 1.52 (1.37–1.66) |  |
| **New York** | 1.83 (1.78–1.87) |  |
| **North Carolina** | 2.37 (2.28–2.45) |  |
| **North Dakota** | 2.09 (1.82–2.37) |  |
| **Ohio** | 2.58 (2.51–2.65) |  |
| **Oklahoma** | 2.92 (2.78–3.06) |  |
| **Oregon** | 1.65 (1.55–1.76) |  |
| **Pennsylvania** | 1.79 (1.74–1.85) |  |
| **Rhode Island** | 2.17 (1.96–2.39) |  |
| **South Carolina** | 2.74 (2.61–2.86) |  |
| **South Dakota** | 2.26 (2.01–2.52) |  |
| **Tennessee** | 2.65 (2.55–2.76) |  |
| **Texas** | 2.58 (2.52–2.64) |  |
| **Utah** | 1.43 (1.29–1.57) |  |
| **Vermont** | 2.65 (2.33–2.96) |  |
| **Virginia** | 1.68 (1.61–1.76) |  |
| **Washington** | 1.90 (1.81–1.99) |  |
| **West Virginia** | 2.50 (2.33–2.68) |  |
| **Wisconsin** | 2.00 (1.91–2.10) |  |
| **Wyoming** | 2.90 (2.53–3.28) |  |

**Supplementary Table 7.** HTN and PE-related AAMR per 100,000 stratified by states in the United States from 2000-2020.

| Year | Medical Facility | Nursing Home/Long Term Care | Hospices | Home | Other |
| --- | --- | --- | --- | --- | --- |
| 2000 | 1718 | 304 | - | 256 | 52 |
| 2001 | 1863 | 343 | - | 313 | 43 |
| 2002 | 2029 | 354 | - | 351 | 55 |
| 2003 | 1999 | 411 | - | 396 | 79 |
| 2004 | 2036 | 453 | - | 425 | 67 |
| 2005 | 2167 | 505 | 16 | 501 | 92 |
| 2006 | 2110 | 532 | 30 | 568 | 97 |
| 2007 | 2245 | 563 | 53 | 646 | 99 |
| 2008 | 2385 | 591 | 72 | 685 | 110 |
| 2009 | 2227 | 557 | 81 | 736 | 96 |
| 2010 | 2402 | 575 | 90 | 863 | 137 |
| 2011 | 2485 | 637 | 123 | 905 | 147 |
| 2012 | 2499 | 686 | 172 | 1011 | 166 |
| 2013 | 2537 | 657 | 160 | 1109 | 152 |
| 2014 | 2474 | 722 | 174 | 1190 | 138 |
| 2015 | 2659 | 717 | 220 | 1294 | 147 |
| 2016 | 2666 | 739 | 239 | 1426 | 189 |
| 2017 | 2830 | 817 | 254 | 1599 | 227 |
| 2018 | 2991 | 894 | 312 | 1637 | 258 |
| 2019 | 3236 | 935 | 429 | 1952 | 265 |
| 2020 | 4481 | 1164 | 458 | 2980 | 406 |
| Total | **52,039** | **13,156** | **2,883** | **20,843** | **3042** |

**Supplementary Table 8.** HTN and PE-related mortality among United States adults stratified by place of death from 2000-2020.

| UCD - 15 Leading Causes of Death | Total Deaths 2000-2020 |
| --- | --- |
| Diseases of heart (I00-I09,I11,I13,I20-I51) | 29473 |
| Malignant neoplasms (C00-C97) | 16357 |
| Essential hypertension and hypertensive renal disease (I10,I12,I15) | 5799 |
| Cerebrovascular diseases (I60-I69) | 5688 |
| Accidents (unintentional injuries) (V01-X59,Y85-Y86) | 3919 |
| Diabetes mellitus (E10-E14) | 3715 |
| Chronic lower respiratory diseases (J40-J47) | 3483 |
| Alzheimer disease (G30) | 1292 |
| COVID-19 (U07.1) | 959 |
| Influenza and pneumonia (J09-J18) | 612 |
| Septicemia (A40-A41) | 536 |
| In situ neoplasms, benign neoplasms and neoplasms of uncertain or unknown behavior (D00-D48) | 525 |
| Complications of medical and surgical care (Y40-Y84,Y88) | 364 |
| Parkinson disease (G20-G21) | 310 |
| Aortic aneurysm and dissection (I71) | 259 |

**Supplementary Table 9.** HTN and PE-related mortality among United States adults stratified by top 15 leading causes of death from 2000-2020.

|  | | |
| --- | --- | --- |
| **Year Interval** | **APC (95% CI)** | **P-value** |
| **Overall** | | |
| 2000-2018 | 2.67 (2.21, 3.12) | < 0.000001 |
| 2018-2020 | 22.16 (14.99, 26.19) | < 0.000001 |
| **Men** | | |
| 2000-2018 | 3.72 (3.16, 4.21) | < 0.000001 |
| 2018-2020 | 22.85 (14.47, 27.20) | < 0.000001 |
| **Women** | | |
| 2000-2005 | 4.42 (2.26, 14.05) | 0.0004 |
| 2005-2018 | 1.47 (-2.12, 1.98) | 0.123575 |
| 2018-2020 | 22.83 (15.78, 27.97) | < 0.000001 |
| 2021–2024 |  | 0.000001 |
| **25-44 years** | | |
| 2000-2012 | 6.27 (5.02, 15.29) | 0.002799 |
| 2012-2018 | 0.95 (-8.33, 4.26) | 0.932214 |
| 2018-2020 | 26.43 (12.71, 38.44) | < 0.000001 |
| **45-64 years** | | |
| 2000-2018 | 4.15 (3.71, 4.65) | < 0.000001 |
| 2018-2020 | 24.31 (18.46, 27.99) | < 0.000001 |
| **65-85+ years** | | |
| 2000-2005 | 5.20 (2.83, 14.00) | < 0.000001 |
| 2005-2018 | 1.68 (-0.69, 2.19) | 0.065587 |
| 2018-2020 | 23.56 (17.46, 28.19) | < 0.000001 |
| **NH White** | | |
| 2000-2018 | 3.32 (2.88, 3.77) | < 0.000001 |
| 2018-2020 | 21.07 (13.36, 24.73) | < 0.000001 |
| **NH Black** | | |
| 2000-2005 | 4.21 (1.47, 14.27) | 0.0004 |
| 2005-2018 | 0.25 (-3.76, 0.87) | 0.629474 |
| 2018-2020 | 27.45 (19.65, 33.50) | < 0.000001 |
| **NH Asian** | | |
| 2000-2018 | 1.08 (-0.24, 2.31) | 0.102779 |
| 2018-2020 | 33.60 (16.06, 45.77) | < 0.000001 |
| **Hispanic** | | |
| 2000-2018 | 2.07 (0.52, 3.29) | 0.022795 |
| 2018-2020 | 28.27 (10.56, 37.95) | < 0.000001 |
| **Non-Metropolitan** | | |
| 2000-2018 | 3.57 (2.80, 4.19) | 0.0008 |
| 2018-2020 | 23.22 (11.76, 28.88) | < 0.000001 |
| **Metropolitan** | | |
| 2000-2018 | 2.50 (2.05, 2.95) | < 0.000001 |
| 2018-2020 | 22.16 (14.74, 26.20) | < 0.000001 |
| **Northeast region** | | |
| 2000-2018 | 2.65 (0.88, 3.58) | 0.023995 |
| 2018-2020 | 20.95 (5.39, 28.42) | < 0.000001 |
| **South region** | | |
| 2000-2018 | 2.68 (2.27, 3.11) | < 0.000001 |
| 2018-2020 | 24.84 (19.35, 28.78) | < 0.000001 |
| **Midwest region** | | |
| 2000-2003 | 9.56 (4.70, 19.53) | < 0.000001 |
| 2003-2018 | 1.96 (1.22, 2.39) | 0.010798 |
| 2018-2020 | 24.49 (18.71, 28.61) | < 0.000001 |
| **West region** | | |
| 2000-2018 | 3.14 (2.23, 3.84) | 0.003599 |
| 2018-2020 | 19.49 (8.65, 24.85) | < 0.000001 |
| **Supplementary Table 10.** Summary APCs of HTN and PE-related AAMR per 100,000 in the United States from 2000 to 2020.  APC = annual percent change; NH = non-Hispanic; * Indicates that the annual percentage change (APC) is significantly different from zero at α = 0.05. AAMR = age-adjusted mortality rate. The data for urbanization was only available till 2020 in the CDC Wonder Database. | | |
|  |
